# Supplementary material
Source: PubMed Central journal article supplement (PMC9283138)

## **Electronic Supplementary Material (ESM) contents**

**ESM Table 1** Meta-analysis results for tirzepatide versus placebo, GLP-1 RAs, and basal insulin for achievement of different HbA<sub>1c</sub> targets

**ESM Table 2** Meta-analysis results for tirzepatide versus placebo, GLP-1 RAs, and basal insulin for achievement of body weight loss of at least 5%, 10%, and 15%

**ESM Table 3** Meta-analysis results for tirzepatide versus placebo, GLP-1 RAs, and basal insulin for discontinuation due to adverse events and for incidence of serious adverse events

**ESM Fig. 1** Meta-analysis results for tirzepatide versus basal insulin for change in HbA<sub>1c</sub> (mmol/mol)

**ESM Fig. 2** Meta-analysis results for tirzepatide versus basal insulin for change in body weight (kg)

**ESM Fig. 3** Meta-analysis results for tirzepatide versus placebo for incidence of hypoglycaemia

**ESM Fig. 4** Meta-analysis results for tirzepatide versus basal insulin for incidence of hypoglycaemia

**ESM Table 1** Meta-analysis results for tirzepatide versus placebo, GLP-1 RAs, and basal insulin for achievement of different HbA<sub>1c</sub> targets

| Intervention                                         | Comparator    | Participants with outcome/analysed, n |                | Odds ratio (95% CI)     | I <sup>2</sup> , % |
|------------------------------------------------------|---------------|---------------------------------------|----------------|-------------------------|--------------------|
|                                                      |               | Tirzepatide arm                       | Comparator arm |                         |                    |
| <b>HbA<sub>1c</sub> &lt; 53 mmol/mol (&lt; 7%)</b>   |               |                                       |                |                         |                    |
| Tirzepatide 5 mg                                     | Placebo       | 236/292                               | 62/284         | 16.25 (8.98 to 29.41)   | 53                 |
|                                                      | GLP-1 RAs     | 432/516                               | 402/515        | 1.47 (1.07 to 2.02)     | 0                  |
|                                                      | Basal insulin | 555/681                               | 711/1331       | 3.51 (2.49 to 4.94)     | 55                 |
| Tirzepatide 10 mg                                    | Placebo       | 250/286                               | 62/284         | 30.70 (10.14 to 92.98)  | 83                 |
|                                                      | GLP-1 RAs     | 454/509                               | 402/515        | 4.08 (0.74 to 22.41)    | 87                 |
|                                                      | Basal insulin | 597/666                               | 711/1331       | 6.92 (5.25 to 9.12)     | 0                  |
| Tirzepatide 15 mg                                    | Placebo       | 279/338                               | 64/304         | 20.87 (10.20 to 42.74)  | 67                 |
|                                                      | GLP-1 RAs     | 469/517                               | 402/515        | 2.84 (1.96 to 4.11)     | 0                  |
|                                                      | Basal insulin | 630/686                               | 711/1331       | 9.02 (6.70 to 12.14)    | 0                  |
| <b>HbA<sub>1c</sub> ≤ 48 mmol/mol (≤ 6.5%)</b>       |               |                                       |                |                         |                    |
| Tirzepatide 5 mg                                     | Placebo       | 214/292                               | 29/284         | 28.72 (10.71 to 77.00)  | 69                 |
|                                                      | GLP-1 RAs     | 376/516                               | 326/515        | 1.80 (1.00 to 3.24)     | 56                 |
|                                                      | Basal insulin | 467/681                               | 466/1331       | 3.63 (2.71 to 4.87)     | 52                 |
| Tirzepatide 10 mg                                    | Placebo       | 232/286                               | 29/284         | 44.95 (14.89 to 135.67) | 55                 |
|                                                      | GLP-1 RAs     | 418/509                               | 326/515        | 3.77 (1.28 to 11.08)    | 81                 |
|                                                      | Basal insulin | 525/666                               | 466/1331       | 6.26 (5.02 to 7.81)     | 0                  |
| Tirzepatide 15 mg                                    | Placebo       | 223/289                               | 29/284         | 35.66 (16.43 to 77.39)  | 56                 |
|                                                      | GLP-1 RAs     | 435/517                               | 326/515        | 3.19 (2.29 to 4.43)     | 5                  |
|                                                      | Basal insulin | 572/686                               | 466/1331       | 8.47 (6.70 to 10.70)    | 0                  |
| <b>HbA<sub>1c</sub> &lt; 39 mmol/mol (&lt; 5.7%)</b> |               |                                       |                |                         |                    |
| Tirzepatide 5 mg                                     | Placebo       | 69/292                                | 5/284          | 11.70 (1.93 to 70.75)   | 56                 |
|                                                      | GLP-1 RAs     | 137/516                               | 92/515         | 1.69 (1.25 to 2.28)     | 0                  |
|                                                      | Basal insulin | 166/681                               | 52/1331        | 7.43 (5.33 to 10.36)    | 0                  |
| Tirzepatide 10 mg                                    | Placebo       | 93/286                                | 5/284          | 25.48 (10.09 to 64.37)  | 0                  |

|                                                                               |               |         |         |                         |    |
|-------------------------------------------------------------------------------|---------------|---------|---------|-------------------------|----|
|                                                                               | GLP-1 RAs     | 214/509 | 92/515  | 3.95 (1.64 to 9.50)     | 27 |
|                                                                               | Basal insulin | 240/666 | 52/1331 | 12.80 (9.26 to 17.69)   | 0  |
| Tirzepatide 15 mg                                                             | Placebo       | 138/289 | 5/284   | 45.76 (18.21 to 114.99) | 0  |
|                                                                               | GLP-1 RAs     | 252/517 | 92/515  | 7.13 (1.53 to 33.17)    | 61 |
|                                                                               | Basal insulin | 315/686 | 52/1331 | 19.53 (14.20 to 26.86)  | 0  |
| CI, confidence interval; GLP-1 RAs, Glucagon-like peptide-1 receptor agonists |               |         |         |                         |    |

**ESM Table 2** Meta-analysis results for tirzepatide versus placebo, GLP-1 RAs, and basal insulin for achievement of body weight loss of at least 5%, 10%, and 15%

| Intervention             | Comparator    | Participants with outcome/analysed, n |                | Odds ratio (95% CI)      | I <sup>2</sup> , % |
|--------------------------|---------------|---------------------------------------|----------------|--------------------------|--------------------|
|                          |               | Tirzepatide arm                       | Comparator arm |                          |                    |
| <b>Weight loss ≥ 5%</b>  |               |                                       |                |                          |                    |
| Tirzepatide 5 mg         | Placebo       | 161/292                               | 22/284         | 14.49 (8.63 to 24.33)    | 0                  |
|                          | GLP-1 RAs     | 342/516                               | 282/515        | 1.96 (1.01 to 3.80)      | 61                 |
|                          | Basal insulin | 438/679                               | 100/1337       | 23.16 (15.47 to 34.67)   | 50                 |
| Tirzepatide 10 mg        | Placebo       | 193/288                               | 22/284         | 28.58 (10.22 to 79.94)   | 24                 |
|                          | GLP-1 RAs     | 414/510                               | 282/515        | 4.79 (1.95 to 11.73)     | 74                 |
|                          | Basal insulin | 552/670                               | 100/1337       | 60.01 (36.63 to 98.29)   | 60                 |
| Tirzepatide 15 mg        | Placebo       | 207/289                               | 22/284         | 33.62 (14.02 to 80.60)   | 45                 |
|                          | GLP-1 RAs     | 433/517                               | 282/515        | 4.57 (3.38 to 6.18)      | 0                  |
|                          | Basal insulin | 595/686                               | 100/1337       | 84.02 (50.65 to 139.40)  | 58                 |
| <b>Weight loss ≥ 10%</b> |               |                                       |                |                          |                    |
| Tirzepatide 5 mg         | Placebo       | 69/292                                | 2/284          | 34.31 (9.54 to 123.40)   | 0                  |
|                          | GLP-1 RAs     | 174/516                               | 122/515        | 1.65 (1.26 to 2.18)      | 0                  |
|                          | Basal insulin | 249/679                               | 25/1337        | 28.24 (16.62 to 47.99)   | 34                 |
| Tirzepatide 10 mg        | Placebo       | 114/288                               | 2/284          | 74.04 (20.85 to 262.92)  | 0                  |
|                          | GLP-1 RAs     | 263/510                               | 122/515        | 3.68 (2.30 to 5.88)      | 23                 |
|                          | Basal insulin | 365/670                               | 25/1337        | 58.52 (36.31 to 94.32)   | 20                 |
| Tirzepatide 15 mg        | Placebo       | 126/289                               | 2/284          | 87.42 (24.58 to 311.00)  | 0                  |
|                          | GLP-1 RAs     | 321/517                               | 122/515        | 5.46 (4.15 to 7.18)      | 0                  |
|                          | Basal insulin | 464/686                               | 25/1337        | 102.68 (66.91 to 157.56) | 0                  |
| <b>Weight loss ≥ 15%</b> |               |                                       |                |                          |                    |
| Tirzepatide 5 mg         | Placebo       | 26/292                                | 0/284          | 16.72 (3.10 to 90.09)    | 0                  |
|                          | GLP-1 RAs     | 73/516                                | 41/515         | 1.91 (1.28 to 2.87)      | 0                  |
|                          | Basal insulin | 89/679                                | 5/1337         | 35.16 (14.51 to 85.18)   | 0                  |
| Tirzepatide 10 mg        | Placebo       | 58/288                                | 0/284          | 46.81 (9.10 to 240.91)   | 0                  |

|                                                                               |               |         |        |                          |    |
|-------------------------------------------------------------------------------|---------------|---------|--------|--------------------------|----|
|                                                                               | GLP-1 RAs     | 138/510 | 41/515 | 5.00 (1.95 to 12.86)     | 29 |
|                                                                               | Basal insulin | 176/670 | 5/1337 | 73.53 (28.05 to 192.76)  | 5  |
| Tirzepatide 15 mg                                                             | Placebo       | 76/289  | 0/284  | 64.61 (12.56 to 332.32)  | 0  |
|                                                                               | GLP-1 RAs     | 198/517 | 41/515 | 7.18 (4.97 to 10.37)     | 0  |
|                                                                               | Basal insulin | 272/686 | 5/1337 | 137.20 (49.17 to 382.79) | 8  |
| CI, confidence interval; GLP-1 RAs, Glucagon-like peptide-1 receptor agonists |               |         |        |                          |    |

**ESM Table 3** Meta-analysis results for tirzepatide versus placebo, GLP-1 RAs, and basal insulin for discontinuation due to adverse events and for incidence of serious adverse events

| Intervention                                                                  | Comparator    | Participants with outcome/analysed, n |                | Odds ratio (95% CI)  | I <sup>2</sup> , % |
|-------------------------------------------------------------------------------|---------------|---------------------------------------|----------------|----------------------|--------------------|
|                                                                               |               | Tirzepatide arm                       | Comparator arm |                      |                    |
| <b>Discontinuation due to adverse events</b>                                  |               |                                       |                |                      |                    |
| Tirzepatide 5 mg                                                              | Placebo       | 16/292                                | 8/286          | 1.99 (0.83 to 4.77)  | 0                  |
|                                                                               | GLP-1 RAs     | 33/525                                | 25/523         | 1.34 (0.78 to 2.29)  | 0                  |
|                                                                               | Basal insulin | 62/687                                | 59/1360        | 3.08 (1.34 to 7.06)  | 61                 |
| Tirzepatide 10 mg                                                             | Placebo       | 19/291                                | 8/286          | 2.39 (1.02 to 5.59)  | 0                  |
|                                                                               | GLP-1 RAs     | 43/520                                | 25/523         | 1.23 (0.30 to 5.09)  | 72                 |
|                                                                               | Basal insulin | 65/688                                | 59/1360        | 3.45 (0.72 to 16.58) | 89                 |
| Tirzepatide 15 mg                                                             | Placebo       | 35/350                                | 9/312          | 3.64 (1.51 to 8.78)  | 13                 |
|                                                                               | GLP-1 RAs     | 53/523                                | 25/523         | 2.29 (1.39 to 3.75)  | 0                  |
|                                                                               | Basal insulin | 75/697                                | 59/1360        | 3.99 (1.00 to 15.98) | 86                 |
| <b>Serious adverse events</b>                                                 |               |                                       |                |                      |                    |
| Tirzepatide 5 mg                                                              | Placebo       | 15/292                                | 15/286         | 1.00 (0.47 to 2.12)  | 0                  |
|                                                                               | GLP-1 RAs     | 34/525                                | 16/523         | 1.23 (0.17 to 9.12)  | 67                 |
|                                                                               | Basal insulin | 77/687                                | 215/1360       | 0.94 (0.51 to 1.75)  | 71                 |
| Tirzepatide 10 mg                                                             | Placebo       | 18/291                                | 15/286         | 1.22 (0.59 to 2.50)  | 0                  |
|                                                                               | GLP-1 RAs     | 28/520                                | 16/523         | 1.80 (0.96 to 3.39)  | 0                  |
|                                                                               | Basal insulin | 74/688                                | 215/1360       | 0.84 (0.63 to 1.13)  | 0                  |
| Tirzepatide 15 mg                                                             | Placebo       | 12/350                                | 15/312         | 0.80 (0.37 to 1.75)  | 0                  |
|                                                                               | GLP-1 RAs     | 29/523                                | 16/523         | 1.65 (0.64 to 4.26)  | 27                 |
|                                                                               | Basal insulin | 67/697                                | 215/1360       | 0.80 (0.39 to 1.63)  | 77                 |
| CI, confidence interval; GLP-1 RAs, Glucagon-like peptide-1 receptor agonists |               |                                       |                |                      |                    |

**ESM Fig. 1** Meta-analysis results for tirzepatide versus basal insulin for change in HbA<sub>1c</sub> (mmol/mol).

MD, mean difference

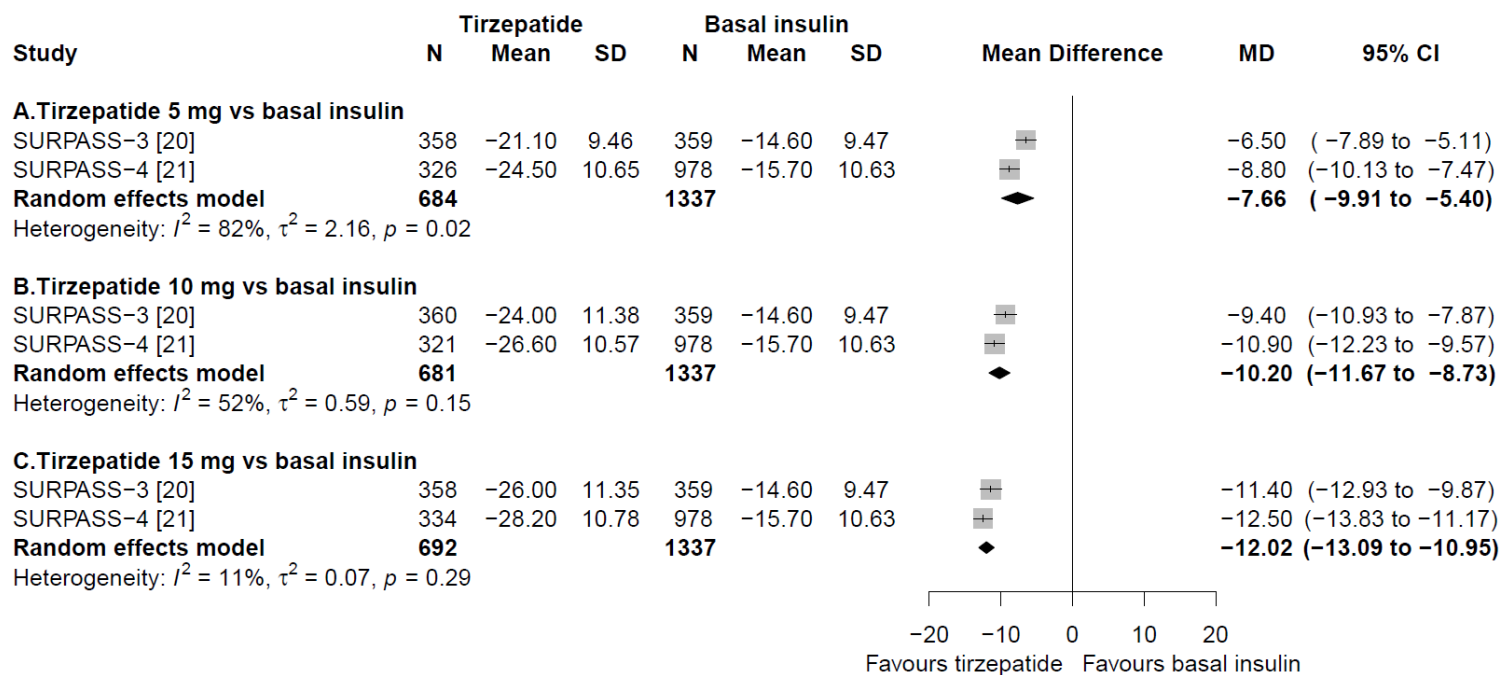

**ESM Fig. 2** Meta-analysis results for tirzepatide versus basal insulin for change in body weight (kg).

MD, mean difference

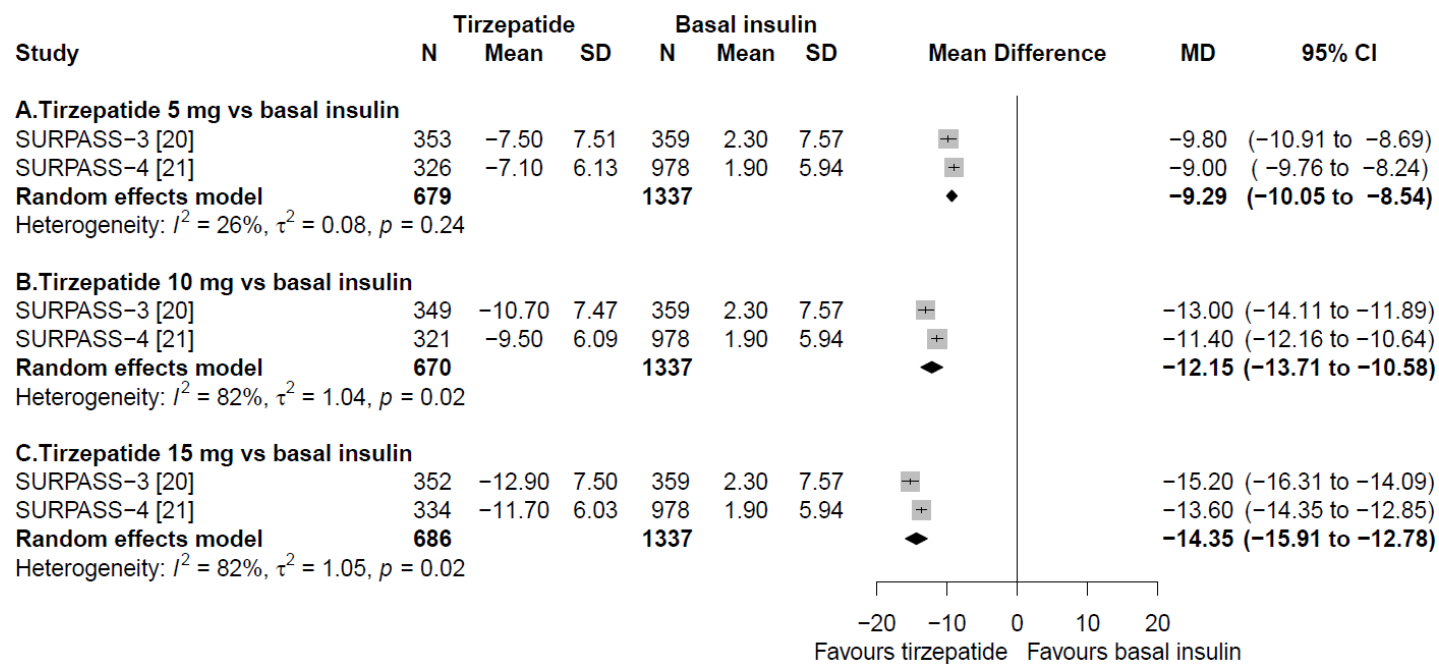



**ESM Fig. 3** Meta-analysis results for tirzepatide versus placebo for incidence of hypoglycaemia

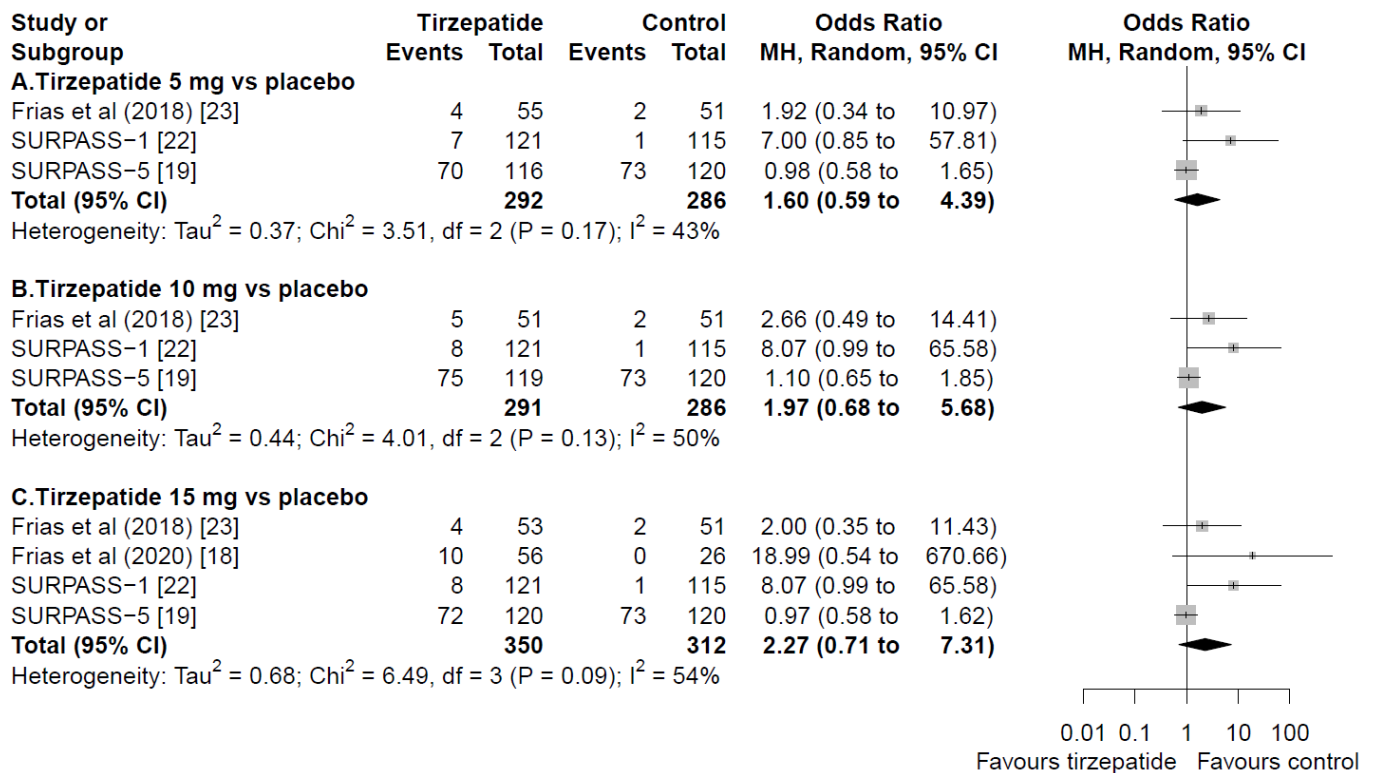

**ESM Fig. 4** Meta-analysis results for tirzepatide versus basal insulin for incidence of hypoglycaemia

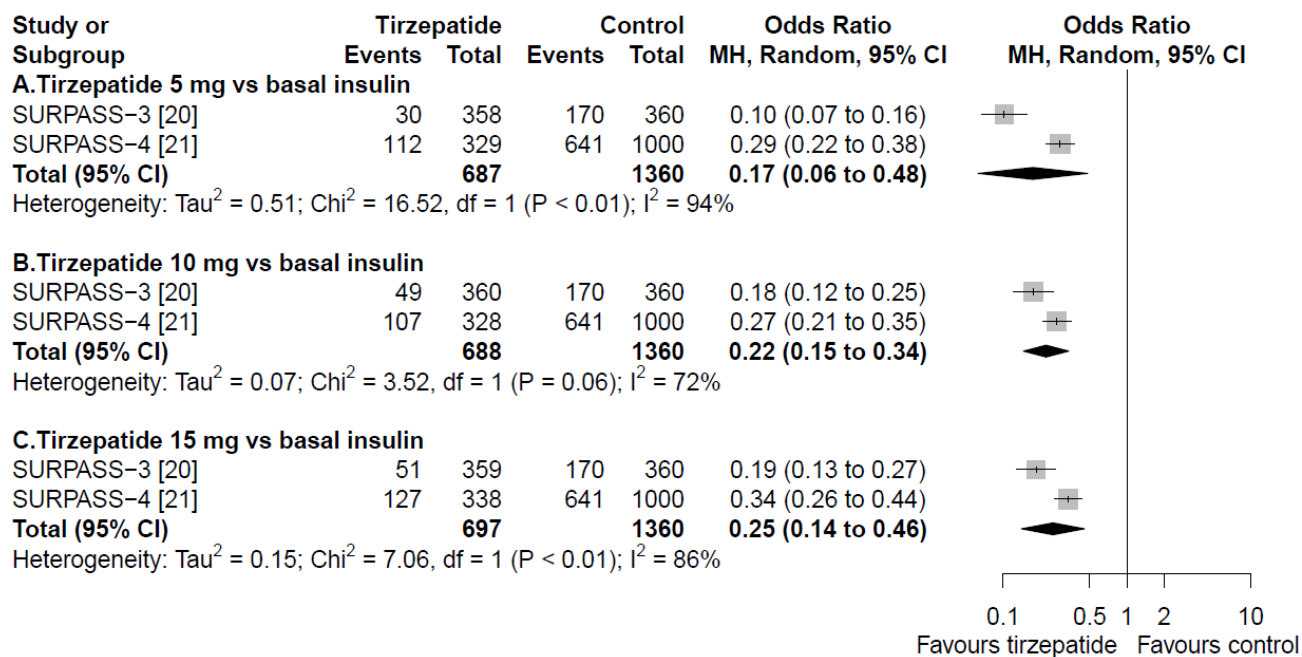

Supplement: 125_2022_5715_MOESM1_ESM.pdf [file 125_2022_5715_MOESM1_ESM.pdf]
